# Supplementary material
Source: HighWire-hosted journal article supplement (https://pmj.bmj.com/content/pmj-2021-141454)
Supplement: inline-supplementary-material-2 [file inline-supplementary-material-2.pdf]

Supplemental Table 2. Subgroup analysis of the relationship between Glucose\_0 and 1-year mortality in non-diabetic patients with AMI

| Subgroups              | N    | Glucose_0 < 139.5 mg/dL<br>(Ref) | Glucose_0 ≥ 139.5 mg/dL |         |
|------------------------|------|----------------------------------|-------------------------|---------|
|                        |      |                                  | HR (95%CI)              | p-value |
| Overall                | 1478 | Ref                              | 2.32(1.89-2.86)         | <0.001  |
| Age                    |      |                                  |                         |         |
| ≥ 65                   | 840  | Ref                              | 1.85(1.47-2.33)         | <0.001  |
| < 65                   | 638  | Ref                              | 3.5(2.17-5.67)          | <0.001  |
| Gender                 |      |                                  |                         |         |
| Male                   | 961  | Ref                              | 2.32(1.75-3.09)         | <0.001  |
| Female                 | 517  | Ref                              | 2.15(1.59-2.92)         | <0.001  |
| Smoke                  |      |                                  |                         |         |
| Yes                    | 165  | Ref                              | 2.64(1.33-5.23)         | 0.005   |
| No                     | 1313 | Ref                              | 2.27(1.82-2.82)         | <0.001  |
| Hypertension           |      |                                  |                         |         |
| Yes                    | 682  | Ref                              | 2.10(1.49-2.97)         | <0.001  |
| No                     | 796  | Ref                              | 2.51(1.93-3.25)         | <0.001  |
| Heart failure          |      |                                  |                         |         |
| Yes                    | 550  | Ref                              | 1.50(1.14-1.97)         | 0.004   |
| No                     | 928  | Ref                              | 3.39(2.46-4.67)         | <0.001  |
| Hyperlipidemia         |      |                                  |                         |         |
| Yes                    | 308  | Ref                              | 1.80(1.01-3.24)         | 0.048   |
| No                     | 1170 | Ref                              | 2.32(1.86-2.91)         | <0.001  |
| Ventricular arrhythmia |      |                                  |                         |         |
| Yes                    | 284  | Ref                              | 2.30(1.40-3.77)         | 0.001   |
| No                     | 1194 | Ref                              | 2.33(1.85-2.94)         | <0.001  |
| Cerebral infarction    |      |                                  |                         |         |
| Yes                    | 30   | Ref                              | 2.30(0.75-7.05)         | 0.145   |
| No                     | 1448 | Ref                              | 2.31(1.87-2.86)         | <0.001  |
| Aspirin                |      |                                  |                         |         |
| Yes                    | 1202 | Ref                              | 2.22(1.73-2.85)         | <0.001  |
| No                     | 276  | Ref                              | 1.96(1.33-2.88)         | 0.001   |
| Clopidogrel            |      |                                  |                         |         |
| Yes                    | 900  | Ref                              | 2.50(1.82-3.43)         | <0.001  |
| No                     | 578  | Ref                              | 1.89(1.43-2.49)         | <0.001  |
| Statin                 |      |                                  |                         |         |
| Yes                    | 1020 | Ref                              | 1.93(1.43-2.60)         | <0.001  |
| No                     | 458  | Ref                              | 2.14(1.59-2.89)         | <0.001  |
| β-blocker              |      |                                  |                         |         |
| Yes                    | 1167 | Ref                              | 1.82(1.40-2.36)         | <0.001  |
| No                     | 311  | Ref                              | 2.50(1.73-3.63)         | <0.001  |
| ACEI                   |      |                                  |                         |         |
| Yes                    | 890  | Ref                              | 1.85(1.32-2.59)         | <0.001  |
| No                     | 588  | Ref                              | 2.38(1.82-3.11)         | <0.001  |

|                                          |      |     |                 |        |
|------------------------------------------|------|-----|-----------------|--------|
| <b>Diuretic</b>                          |      |     |                 |        |
| Yes                                      | 742  | Ref | 1.67(1.26-2.20) | <0.001 |
| No                                       | 736  | Ref | 3.38(2.45-4.65) | <0.001 |
| <b>Insulin</b>                           |      |     |                 |        |
| Yes                                      | 190  | Ref | 2.77(1.60-4.81) | <0.001 |
| No                                       | 1288 | Ref | 2.21(1.76-2.77) | <0.001 |
| <b>WBC, 10<sup>3</sup>/μL</b>            |      |     |                 |        |
| ≥ 12                                     | 672  | Ref | 2.07(1.55-2.77) | <0.001 |
| < 12                                     | 806  | Ref | 2.27(1.66-3.09) | <0.001 |
| <b>Platelet count, 10<sup>3</sup>/μL</b> |      |     |                 |        |
| ≥ 300                                    | 258  | Ref | 2.94(1.84-4.71) | <0.001 |
| < 300                                    | 1220 | Ref | 2.15(1.70-2.71) | <0.001 |
| <b>Hemoglobin, mg/dL</b>                 |      |     |                 |        |
| ≥ 12                                     | 703  | Ref | 3.23(2.16-4.82) | <0.001 |
| < 12                                     | 775  | Ref | 1.97(1.55-2.52) | <0.001 |
| <b>Creatinine, mg/dL</b>                 |      |     |                 |        |
| ≥ 1.0                                    | 695  | Ref | 2.13(1.66-2.74) | <0.001 |
| < 1.0                                    | 783  | Ref | 1.89(1.29-2.77) | <0.001 |
| <b>Urea, mg/dL</b>                       |      |     |                 |        |
| ≥ 21                                     | 512  | Ref | 1.46(1.13-1.90) | 0.004  |
| < 21                                     | 966  | Ref | 3.49(2.46-4.97) | <0.001 |
| <b>SOFA score</b>                        |      |     |                 |        |
| ≥ 4                                      | 571  | Ref | 1.62(1.25-2.09) | <0.001 |
| < 4                                      | 907  | Ref | 1.92(1.32-2.79) | 0.001  |

Glucose<sub>0</sub>: admission blood glucose; ACEI: angiotensin-converting enzyme inhibitor; WBC: white blood cell count; SOFA: sequential organ failure assessment; Ref: reference.
